# Supplementary material for: m6A-Related lncRNAs Are Potential Biomarkers for the Prognosis of Metastatic Skin Cutaneous Melanoma
Source: Front Mol Biosci. 2021 May 5;8:687760. doi: 10.3389/fmolb.2021.687760 (PMC8131514; doi:10.3389/fmolb.2021.687760)
Supplement: Supplementary file 1 [file Table2.XLSX]

## Sheet: TCGA-commonlnc-uniCox-P0.05
Supplemental Table 2.Univariate cox regression analysis
id	HR	HR.95L	HR.95H	pvalue
CTD.3064M3.4	3.68263	1.93925	6.9933	6.78e-05
RP13.379O24.3	1.87861e+19	2226071501	1.59e+29	0.000141432
RP11.21I10.2	1.34047	1.15022	1.56219	0.000175397
RP11.341A22.2	5.03e+49	2.76e+23	9.15e+75	0.000207656
LRP4.AS1	5.24839	2.12858	12.9408	0.000317418
CTD.2529O21.1	3.66147	1.80256	7.43739	0.000331219
AC018464.3	28.9235	4.17097	200.57	0.00066064
CTA.384D8.35	0.600525	0.443936	0.812348	0.000939019
RP11.480I12.7	2.43499	1.4311	4.14308	0.00103159
AC099552.2	9.53737e+06	530.444	171482000000	0.00130415
CTA.384D8.34	0.671229	0.525791	0.856898	0.00137692
CTD.2647L4.4	1.20138	1.06815	1.35122	0.00221784
RP11.24F11.2	0.279243	0.123205	0.632902	0.00224538
RP11.360K13.1	579779000000	14179.5	2.37062e+19	0.00245361
RP11.316P17.2	0.0780056	0.0147425	0.412744	0.00269087
WAC.AS1	0.905881	0.848794	0.966806	0.00291627
RP11.539L10.2	0.0560456	0.00838407	0.374652	0.00295101
LINC01150	0.307121	0.139204	0.677592	0.00345576
RP11.483P21.2	0.0627715	0.00979688	0.402196	0.00348848
CTD.2291D10.4	1.47367	1.13167	1.91903	0.00400157
AC004870.4	38.927	3.21291	471.632	0.0040144
RP11.264I13.2	0.561398	0.377052	0.835874	0.00447311
STK4.AS1	0.0577624	0.0077586	0.430039	0.00537185
AC009133.12	0.107546	0.0221944	0.521128	0.00561519
RP11.549J18.1	0.0114721	0.000469959	0.280045	0.00612982
RP11.69C17.4	6409200000000	3808.82	1.08e+22	0.00651512
RP11.220I1.1	0.896204	0.827508	0.970602	0.00707468
RP11.739N20.2	1.66797	1.14934	2.42062	0.00709277
CTD.2587H19.1	0.56742	0.375186	0.858149	0.00725824
RP1.134E15.3	0.0578444	0.00698533	0.479001	0.00823201
RP11.78O7.2	0.577911	0.383218	0.871518	0.00889536
RP11.247L20.4	0.826704	0.716129	0.954352	0.00938437
AC009495.2	1.16939	1.03873	1.31648	0.00963633
RP11.493L12.5	0.319323	0.134474	0.758267	0.009679
RP5.899E9.1	0.35971	0.165709	0.780831	0.00972163
LINC00615	439021000000000	3413.19	5.65e+25	0.00978595
AC093818.1	0.269756	0.0994448	0.731746	0.010071
RP11.326I11.3	0.707256	0.543167	0.920917	0.0101212
LINC00311	1141.78	5.25505	248080	0.0103388
RP5.1073O3.2	1.62e-06	5.99e-11	0.0440333	0.01048
RP11.353N4.5	8.78e-06	1.17e-09	0.0655855	0.0105079
DACT3.AS1	11.2095	1.75762	71.4908	0.0105719
JPX	0.786623	0.654164	0.945904	0.010738
RP11.473M20.9	0.328426	0.139382	0.773867	0.0108906
XXbac.BPG252P9.10	1.5158	1.09949	2.08973	0.0111193
RP11.395B7.7	0.941058	0.897642	0.986573	0.011706
LINC00094	1.11152	1.02247	1.20832	0.0130832
CTD.3110H11.1	1.46738	1.08247	1.98918	0.0134943
RP11.338C15.3	0.0149324	0.000517712	0.430695	0.0142438
RP11.317N8.5	1.54954	1.09117	2.20046	0.0143824
RP11.275I4.2	0.0119245	0.000330409	0.430356	0.0154868
RP11.207C16.4	0.00112769	4.63e-06	0.274733	0.0154894
AC144450.2	741648000000	175.306	3.14e+21	0.0156573
RP5.1091N2.9	0.531375	0.317617	0.888994	0.016036
TTTY1B	27750.6	6.55585	1.17467e+08	0.016337
RP11.429E11.2	1.01542	1.00281	1.0282	0.0164029
BHLHE40.AS1	0.410405	0.196436	0.857442	0.0178319
RP11.137L10.6	0.261491	0.0854666	0.80005	0.0187255
RP11.757F18.5	1.40506	1.05813	1.86575	0.0187507
RP11.973H7.4	0.047345	0.00370625	0.604803	0.0189328
RP4.584D14.5	1.40377	1.05708	1.86418	0.0191035
VIM.AS1	0.730513	0.561524	0.950359	0.0193213
RP11.330O11.3	0.0603073	0.00559614	0.649906	0.0206003
RP5.1031D4.2	0.000922985	2.39e-06	0.355808	0.0214425
AC083949.1	0.21499	0.0577111	0.800899	0.0219726
RP11.731C17.2	0.40447	0.186219	0.878511	0.0221807
RP11.733O18.1	0.340837	0.135203	0.859223	0.0225139
RP11.1094M14.5	0.614583	0.401453	0.940863	0.0250574
CTB.92J24.2	1.84036	1.07823	3.14118	0.0253463
RP3.508I15.22	0.0783901	0.00839214	0.732234	0.0255265
RP5.1092A3.4	0.404811	0.182734	0.89678	0.0258525
RP11.196I18.4	0.562474	0.338459	0.934756	0.026398
RP11.313P22.1	0.310463	0.110425	0.872871	0.0265712
LINC00422	0.177427	0.0381628	0.824896	0.0274202
RP11.589N15.2	1.03397	1.00356	1.0653	0.0282946
LINC01094	0.7054	0.516111	0.964112	0.0285799
AC096579.7	0.948074	0.903704	0.994623	0.0292253
RP11.284N8.3	0.792243	0.64243	0.97699	0.0294335
RP11.1191J2.5	0.407173	0.181274	0.914585	0.0295394
CTB.118N6.3	2.05091	1.07194	3.92395	0.0300213
RP1.149A16.17	5.97705	1.18825	30.0653	0.0300652
KB.173C10.2	1e-06	3.64e-12	0.276295	0.0306775
RP11.689B22.2	0.131319	0.0207143	0.832501	0.0311996
RP11.326I11.5	0.312939	0.108441	0.903077	0.0316738
AP003774.1	0.295063	0.0959242	0.907617	0.0332505
LINC00339	0.949956	0.906103	0.995933	0.033256
GS1.204I12.4	14.3942	1.23227	168.14	0.0334611
RP13.228J13.1	0.240804	0.0646494	0.896937	0.0338309
RP11.472G21.2	1.7192	1.04073	2.83997	0.0343574
AC005082.12	0.0788871	0.00747729	0.832277	0.0346279
RP11.96D1.5	0.071619	0.00614903	0.834162	0.0353153
RP11.5C23.1	0.840654	0.715153	0.98818	0.0353695
AC124944.3	0.0117461	0.000185173	0.745087	0.0358226
RP11.121A8.1	0.254483	0.0706233	0.917003	0.036399
AC009299.3	0.112582	0.0144064	0.879787	0.0373372
AF127936.3	0.00410386	2.3e-05	0.732023	0.037718
RP11.10L12.4	1.29997	1.01443	1.66587	0.0381542
AC009473.1	0.0777498	0.00694266	0.870709	0.0382386
RP11.800A3.3	4.23e-05	3.03e-09	0.590228	0.0386172
RP11.290F5.1	0.404621	0.171642	0.953836	0.0386412
AC005083.1	0.489107	0.247842	0.965235	0.0392095
RP11.383I23.2	0.0165383	0.000333764	0.819486	0.0394048
LINC00996	0.524605	0.283947	0.96923	0.0394224
RP11.48B3.3	2.77509	1.04925	7.33967	0.0397012
RP11.558A11.2	15.4621	1.13118	211.352	0.0401361
RP11.159F24.3	0.205398	0.04505	0.936474	0.0408793
CTC.459I6.1	9.86e-06	1.52e-10	0.640858	0.0414839
IFNG.AS1	0.346797	0.125096	0.961408	0.0417892
RP1.90J4.1	0.00394414	1.91e-05	0.815573	0.0418603
CTD.2090I13.1	53.2793	1.15227	2463.56	0.042111
AC006369.2	0.341112	0.120876	0.962619	0.0421599
CTC.301O7.4	1.2855	1.00892	1.63789	0.0421743
RP11.253D19.1	9.3e-05	1.15e-08	0.752075	0.0431733
CTD.2306M10.1	0.61911	0.388228	0.987298	0.0440462
PCED1B.AS1	0.904535	0.820222	0.997514	0.0444502
RP11.775D22.3	0.438738	0.196375	0.980222	0.0445723
CTD.2035E11.5	0.336601	0.116267	0.974485	0.0446837
SNHG17	1.05965	1.00129	1.12141	0.0449964
RP11.1399P15.1	0.799229	0.641957	0.995032	0.0450149
CTD.2514K5.2	1.085	1.00151	1.17545	0.0458389
CTD.2035E11.4	0.174727	0.0314823	0.969731	0.0460303
RP11.525G13.2	2.44084	1.01534	5.86771	0.046155
RP11.67L2.2	0.672718	0.455593	0.993318	0.046187
AC006129.2	0.820832	0.67589	0.996857	0.0464023
AP001372.2	0.830563	0.691752	0.997228	0.0466221
CTB.47B11.3	0.000502346	2.74e-07	0.919362	0.0474905
LINC00350	Inf	8.69833e+06	Inf	0.0477688
TTTY2B	332.232	1.03877	106258	0.048508
LIPE.AS1	1.25807	1.00131	1.58066	0.0486987
RP11.415F23.4	0.544388	0.297339	0.996702	0.0487617
